# Supplementary material for: RNA-seq analyses of the midgut from blood- and serum-fed Ixodes ricinus ticks
Source: PubMed Central journal article supplement (PMC5099782; doi:10.1038/srep36695), 2016-11-08
Supplement: srep36695-s1.pdf [file srep36695-s1.pdf]

## **Supplementary Information**

### **RNA-seq analyses of the midgut from blood- and serum-fed *Ixodes ricinus* ticks**

Jan Perner, Jan Provazník, Jana Schrenková, Veronika Urbanová,

José M. C. Ribeiro, Petr Kopáček

**Table S1. The summary of Miseq the reads after removal of Illumina primers and trimming low base quality (smaller than 20).**

| <b>Library name</b> | <b>Meal</b> | <b>Time in days</b> | <b>Total number of sequences</b> | <b>Total number of residues</b> | <b>Average length</b> | <b>Median size</b> | <b>L50</b> |
|---------------------|-------------|---------------------|----------------------------------|---------------------------------|-----------------------|--------------------|------------|
| B1                  | Blood       | 3                   | 2,155,570                        | 623,472,674                     | 289.2                 | 300                | 300        |
| B2                  | Blood       | 3                   | 3,413,789                        | 983,125,506                     | 287.9                 | 300                | 300        |
| B3                  | Blood       | 3                   | 1,913,967                        | 547,583,431                     | 286.0                 | 300                | 300        |
| B4                  | Blood       | 3                   | 2,747,297                        | 786,753,771                     | 286.3                 | 300                | 300        |
| B5                  | Blood       | 8                   | 3,203,379                        | 903,713,423                     | 282.1                 | 300                | 300        |
| B6                  | Blood       | 8                   | 2,371,577                        | 677,111,683                     | 285.5                 | 300                | 300        |
| B7                  | Blood       | 8                   | 3,108,306                        | 892,945,075                     | 287.2                 | 300                | 300        |
| B8                  | Blood       | 8                   | 4,172,957                        | 1,188,549,527                   | 284.8                 | 300                | 300        |
| S1                  | Serum       | 3                   | 3,213,133                        | 912,458,003                     | 283.9                 | 300                | 300        |
| S2                  | Serum       | 3                   | 3,118,604                        | 878,902,497                     | 281.8                 | 300                | 300        |
| S3                  | Serum       | 3                   | 3,007,399                        | 840,317,863                     | 279.4                 | 300                | 300        |
| S4                  | Serum       | 3                   | 3,228,533                        | 903,949,950                     | 279.9                 | 300                | 300        |
| S5                  | Serum       | 8                   | 3,064,434                        | 866,807,467                     | 282.8                 | 300                | 300        |
| S6                  | Serum       | 8                   | 2,395,662                        | 670,246,143                     | 279.7                 | 300                | 300        |
| S7                  | Serum       | 8                   | 2,601,754                        | 726,967,206                     | 279.4                 | 300                | 300        |
| S8                  | Serum       | 8                   | 2,507,908                        | 678,757,731                     | 270.6                 | 300                | 300        |
| <b>Total</b>        |             |                     | 46,224,269                       | 13,081,661,950                  |                       |                    |            |
| <b>Average</b>      |             |                     | 2,889,017                        | 817,603,872                     | 283                   |                    |            |
| <b>Minimum</b>      |             |                     | 1,913,967                        | 547,583,431                     |                       |                    |            |
| <b>Maximum</b>      |             |                     | 4,172,957                        | 1,188,549,527                   |                       |                    |            |

**Table S2. The summary of Hiseq the reads after removal of Illumina primers and trimming low base quality (smaller than 20).**

| <b>Library name</b> | <b>Meal</b> | <b>Feeding time in days</b> | <b>Total number of sequences</b> | <b>Total number of residues</b> | <b>Average length</b> | <b>Median size</b> | <b>L50</b> |
|---------------------|-------------|-----------------------------|----------------------------------|---------------------------------|-----------------------|--------------------|------------|
| B1                  | Blood       | 3                           | 9,629,494                        | 1,190,648,679                   | 123.7                 | 125                | 125        |
| B2                  | Blood       | 3                           | 15,544,323                       | 1,860,018,389                   | 119.6                 | 125                | 125        |
| B3                  | Blood       | 3                           | 11,884,809                       | 1,320,412,881                   | 111.1                 | 125                | 125        |
| B4                  | Blood       | 3                           | 12,704,580                       | 1,479,349,109                   | 116.4                 | 125                | 125        |
| B5                  | Blood       | 8                           | 15,348,566                       | 1,766,877,794                   | 115.1                 | 125                | 125        |
| B6                  | Blood       | 8                           | 11,105,251                       | 1,303,445,535                   | 117.3                 | 125                | 125        |
| B7                  | Blood       | 8                           | 14,939,645                       | 1,754,368,386                   | 117.4                 | 125                | 125        |
| B8                  | Blood       | 8                           | 15,951,632                       | 1,878,440,011                   | 117.7                 | 125                | 125        |
| S1                  | Serum       | 3                           | 15,033,927                       | 1,821,330,422                   | 121.1                 | 125                | 125        |
| S2                  | Serum       | 3                           | 13,825,806                       | 1,651,700,131                   | 119.5                 | 125                | 125        |
| S3                  | Serum       | 3                           | 15,959,483                       | 1,902,584,122                   | 119.2                 | 125                | 125        |
| S4                  | Serum       | 3                           | 14,125,114                       | 1,692,400,404                   | 119.8                 | 125                | 125        |
| S5                  | Serum       | 8                           | 11,945,337                       | 1,470,248,650                   | 123.0                 | 125                | 125        |
| S6                  | Serum       | 8                           | 10,181,106                       | 1,255,324,249                   | 123.3                 | 125                | 125        |
| S7                  | Serum       | 8                           | 10,753,913                       | 1,325,093,390                   | 123.2                 | 125                | 125        |
| S8                  | Serum       | 8                           | 7,485,714                        | 917,067,908                     | 122.5                 | 125                | 125        |
| <b>Total</b>        |             |                             | 206,418,700                      | 24,589,310,060                  |                       |                    |            |
| <b>Average</b>      |             |                             | 12,901,169                       | 1,536,831,879                   | 119                   |                    |            |
| <b>Minimum</b>      |             |                             | 7,485,714                        | 917,067,908                     |                       |                    |            |
| <b>Maximum</b>      |             |                             | 15,959,483                       | 1,902,584,122                   |                       |                    |            |

**Table S3: List of oligonucleotides used in this work for RT-qPCR analyses of direct and independent validations, tissue profile expression of Day-3 up-regulated contigs, and tissue profile expression of Day-8 up-regulated contigs**

| <b>Transcript</b>                   | <b>Contig no.</b> | <b>Forward primer (5'-3')</b> | <b>Reverse primer (5'-3')</b> |
|-------------------------------------|-------------------|-------------------------------|-------------------------------|
| <i>gst</i>                          | Ir-114935         | ggttcgtcctgtgggaaag           | actgtccggggcgtactt            |
| <i>gst</i>                          | Ir-113744         | ttatgcatttggatgcttcg          | gccctgtcagggttggtcata         |
| <i>sult</i>                         | Ir-110976         | ggtcgacagagttccctacg          | tcccacgggttacgatagac          |
| <i>ache</i>                         | Ir-108903         | cgtttctcatgagtggcaca          | tggactgcactctcgaac            |
| <i>Na<sup>+</sup>-bile acid c-t</i> | IrSigP-109984     | atggcatcgtggcaactc            | gggatggaccctagctc             |
| <i>ph-gpx</i>                       | IrSigP-109202     | ctggaagtacctcaaggaaag         | ctgtccattcttgtccacca          |
| <i>pm-chbp</i>                      | Ir-113572         | cgacaacagctatcggatga          | aggtgtggttagcgacgaatc         |
| <i>cyp450</i>                       | IrSigP-117992     | gcgaaggagcaggttctct           | agatttggttcgggtccag           |
| <i>m20</i>                          | Ir-107651         | caacatctccatgcttcgac          | cattaagcatcacccatga           |
| <i>cyp450</i>                       | IrSigP-112182     | ctcaggagaccgctgagttt          | gcgttatattgocggaaaag          |
| <i>unknown</i>                      | IrSigP-112102     | gtgctacaaagccaacgaca          | ggacgggtggaggaaggtt           |
| <i>unknown</i>                      | Ir-111905         | atgagccattatcctgacg           | gacacggtgagagtggctcg          |
| <i>unknown</i>                      | IrSigP-107775     | acgggaatgaacttgacagc          | cgacaatgtttcggattctg          |
| <i>unknown</i>                      | IrSigP-111681     | ctgaaaggagtgaccgttgc          | ggccgacaccttgttgaa            |
| <i>plA2</i>                         | Ir-111829         | gacaactccgacgacaacatc         | agaactggcgggtcatctttg         |
| <i>smpd</i>                         | Ir-103540         | gccctcatcaagctgctc            | ctcgtccttgttagaggctatgg       |
| <i>a-smase</i>                      | Ir-110985         | agtcgggtcccatcaacag           | gccactggacgggtgtagttt         |
| <i>lip</i>                          | Ir-108861         | catcttttcgactccgtct           | cgggagtagagcatgaacttg         |
| <i>pep synthase</i>                 | IrSigP-110295     | tcgagtacaaatggcagcac          | cacgtcagactgcaccatct          |
| <i>grp</i>                          | IrSigP-109251     | caggaagaaacgggcaagta          | ccggagggtccttctggtc           |
| <i>grp</i>                          | Ir-109833         | tggttctaagggcgagaaaag         | aaacctggtagtccatttctgc        |
| <i>sult</i>                         | Ir-114115         | cttacgactgttgcgtgtcc          | cgaactggtaagcaggggaag         |
| <i>plc</i>                          | IrSigP-114509     | cctagtggcgatggatttct          | ttagcatcgatggcaacatt          |
| <i>ak</i>                           | Ir-98671          | ggcaacactagacaagctgga         | agcgacttgcagtccttagc          |
| <i>hsd17b8</i>                      | Ir-100072         | tcacaagtggatgtccggta          | caccacgatgcttaaaggaag         |
| <i>vmat</i>                         | IrSigP-107534     | ggattctacatccgggacac          | gcagaaccacgtcactgt            |
| <i>acyl-CoA synthetase</i>          | Ir-121498         | gttgactgcgcaactcgtc           | aacgaagtccttgagtttctcg        |
| <i>jh-acid mt</i>                   | Ir-113115         | gaaagaaatggtcgcagacg          | tggactagcggggtaaacag          |
| <i>gpx</i>                          | Ir-97790          | ccagaagatcgaggatgaacg         | aacgacccttgaggaaagtgt         |
| <i>kunitz 80</i>                    | Ir-113156         | atgttccggcgctacaaat           | cgcagcctccgtaaatgt            |
| <i>vitellogenin 2</i>               | IrSigP-108669     | cctcacttccctccagacttc         | ccaggagcaagtgcaggac           |
| <i>org. anion trans.</i>            | Ir-109200         | gaatgttgctgtcggctcttg         | tgccgtggattccgtaag            |
| <i>hsd17b8</i>                      | Ir-118795         | gcaagtgtgggtatgccttt          | gacttcgtgaacgcaatgac          |
| <i>15-oh-pg-dh</i>                  | Ir-113345         | tcgttgatcaataatgcagggtg       | aagcaggggtccacagaatg          |
| <i>sec14</i>                        | Ir-113452         | caattgtccggcatctga            | tttgttccgtgaaggtggat          |
| <i>ache</i>                         | IrSigP-113423     | gaacctacgacgcaacgact          | gtggtttcttcacgttctcaagt       |
| <i>ir-cp6</i>                       | Ir-108832         | catcgaggatcacgagagg           | tgatcatcatcttggagtacgg        |
| <i>ef</i>                           | IrSigP-108204     | acgaggctctgacggaag            | cacgacgcaactccttcac           |
| <i>actin</i>                        | Ir-107867         | cgacatcaaggagaagctctg         | gtcgggaagctcgtaggac           |

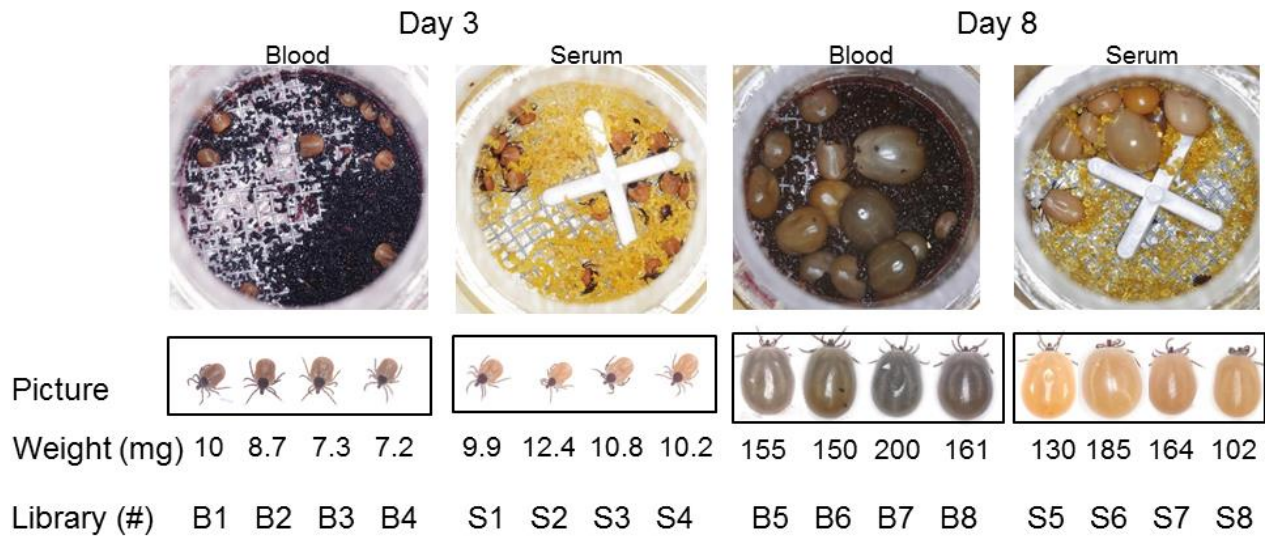

**Figure S1. Overview of the experimental design and libraries designation.** Libraries were prepared from individual first-generation siblings *Ixodes ricinus* females fed *in vitro* for 3 days or 8 days. Females were fed either reconstituted bovine blood or bovine serum. Similarly appearing tick females were forcibly removed at indicated time points. Weights of individual females and corresponding library names, used in Source data 1, are shown.

A)

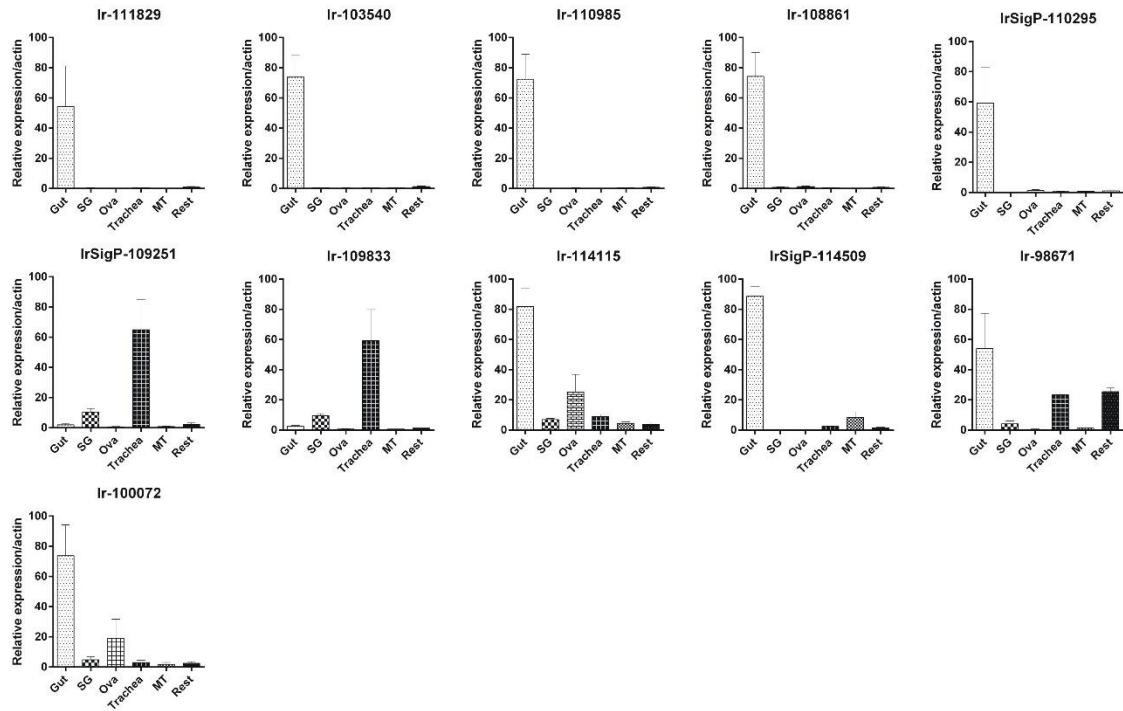

B)

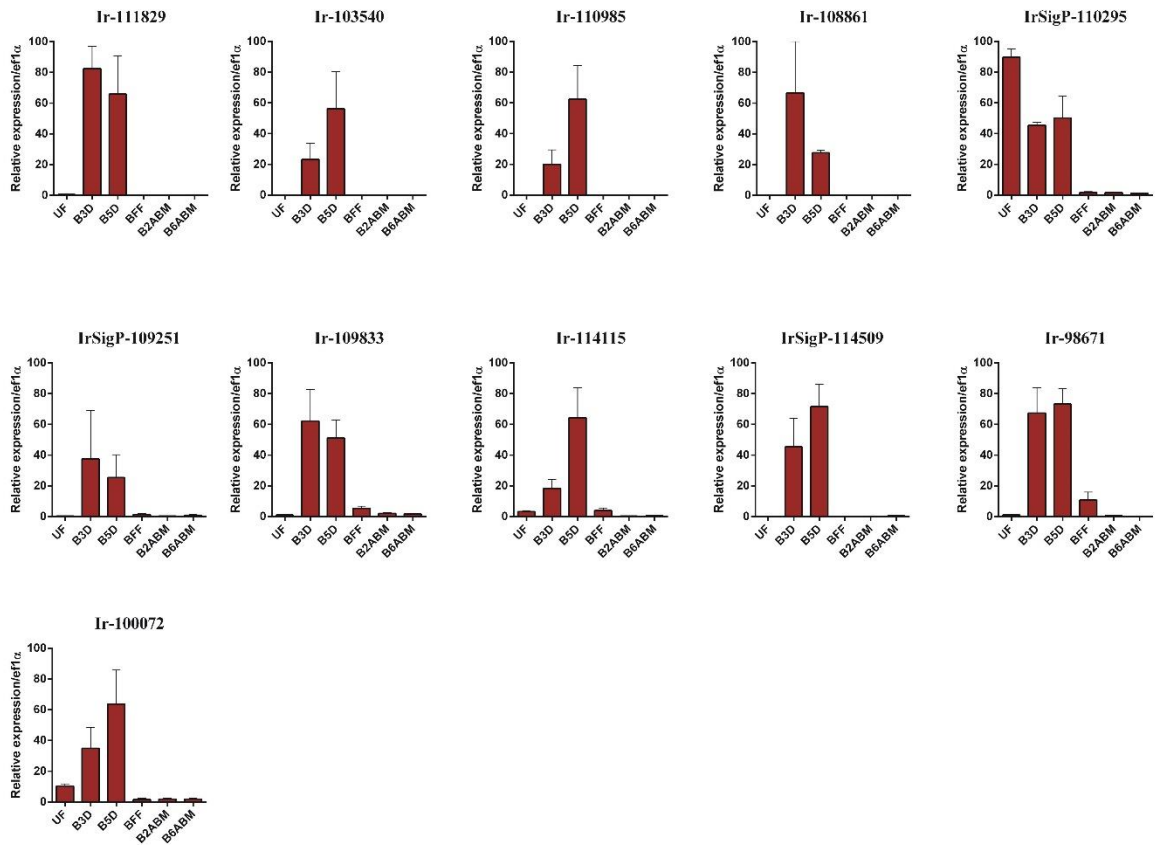

**Figure S2. RT-qPCR profiles of genes over-represented in the gut of 3D ticks.** **A)** cDNA samples were synthesised from RNA isolated from dissected tissues of *I. ricinus* females collected in wild, fed naturally for 3 days. SG - salivary glands, Ova - ovaries; Trachea - trachea-fat body complex; MT - Malpighian tubules; Rest - remaining tissues. Mean values and SEM are shown, n = 3 (biological replicates) **B)** cDNA samples were synthesised from RNA isolated from dissected gut of *I. ricinus* females before, during, and after feeding. UF - unfed, B3D - blood-fed for 3 days; B5D - blood-fed for 5 days; BFF - blood-fed for 9 days (fully fed); B2ABM - 2 days after blood-meal; B6ABM - 6 days after blood-meal. Mean values and SEM are shown, n = 3 (biological replicates).

A)

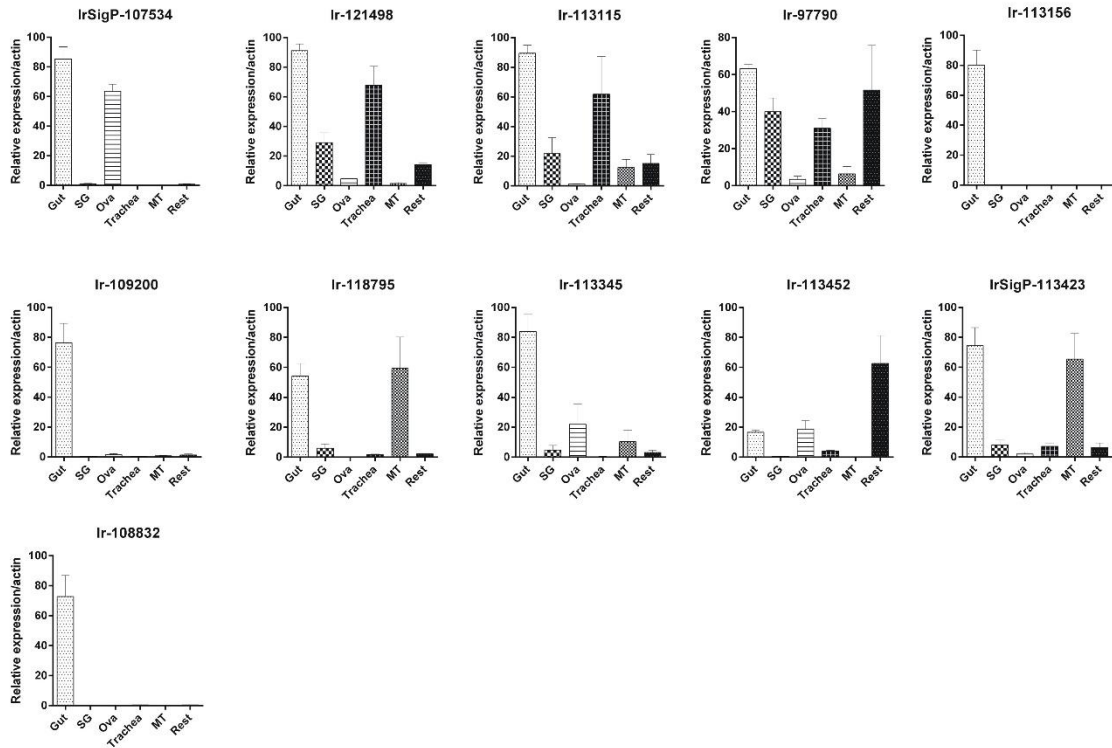

B)

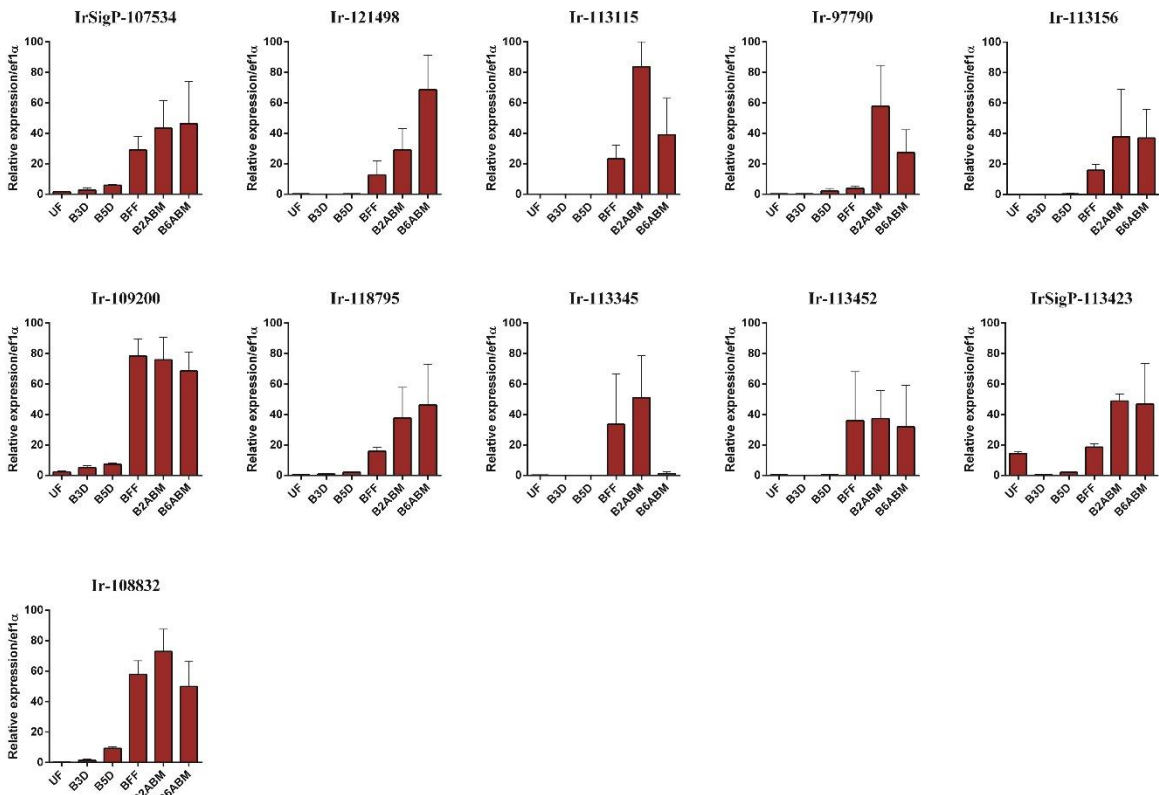



**Figure S3. RT-qPCR profiles of genes over-represented in the gut of 8D ticks.** **A)** cDNA samples were synthesised from RNA isolated from dissected tissues of *I. ricinus* females collected in wild, fed naturally for 3 days. SG - salivary glands, Ova - ovaries; Trachea - trachea-fat body complex; MT - Malpighian tubules; Rest - remaining tissues. Mean values and SEM are shown, n = 3 (biological replicates) **B)** cDNA samples were synthesised from RNA isolates of dissected gut of *I. ricinus* females before, during, and after feeding. UF - unfed, B3D - blood-fed for 3 days; B5D - blood-fed for 5 days; BFF - blood-fed for 9 days (fully fed); B2ABM - 2 days after blood-meal; B6ABM - 6 days after blood-meal. Mean values and SEM are shown, n = 3 (biological replicates).

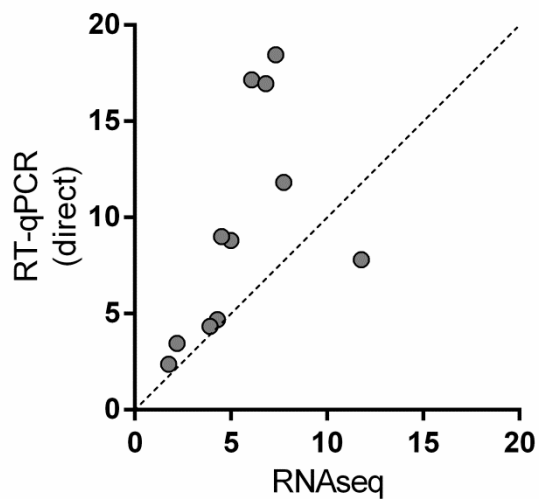

**Figure S4. Correlation of direct RT-qPCR validation and RNA-seq data.** Individual RT-qPCR fold change up-regulations (based on mean relative expression value from three biological triplicates) are plotted against RPKM up-regulations from RNA-seq data. Following contigs were used as representatives for validation: Ir-114935, Ir-110976, Ir-113572, Ir-108903, IrSigP-117992, IrSigP-109202, Ir-107651, IrSigP-112182, IrSigP-112102, Ir-111905, IrSigP-107775.

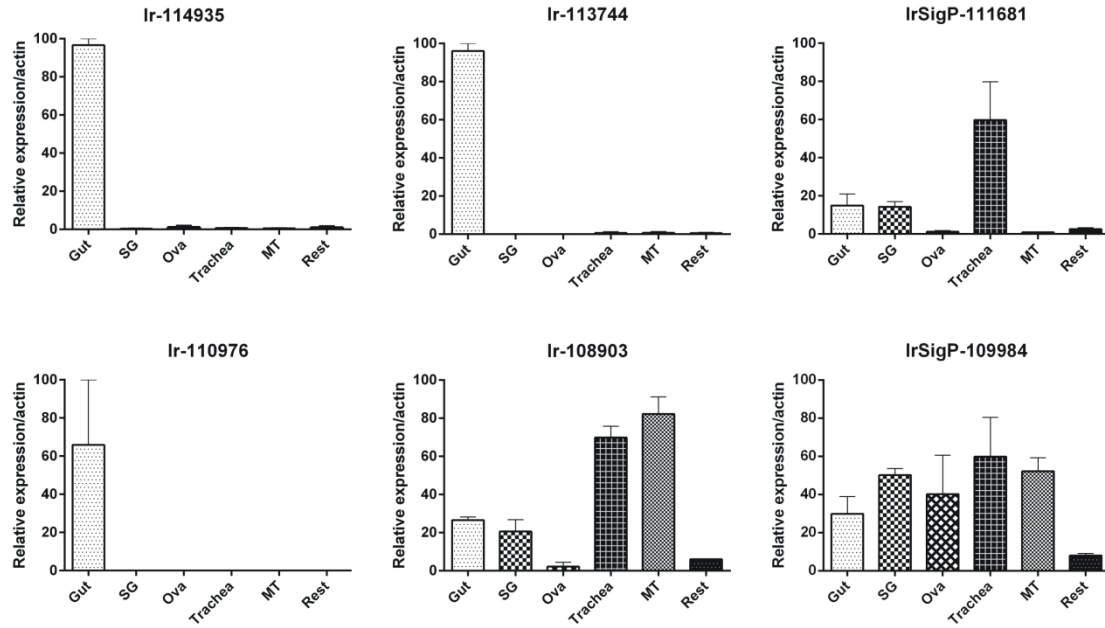

**Figure S5. Tissue expression profile of differentially expressed genes in the gut of blood-fed and serum-fed ticks.** Three sets of cDNA from selected tissues of naturally fed ticks for 3 days or 8 days were synthesised. Tissue expression profiling was analysed by RT-qPCR at the time-point of differential expression (Day 3 or Day 8). SG - salivary glands, Ova - ovaries; Trachea - trachea-fat body complex; MT - Malpighian tubules; Rest - remaining tissues. Mean values and SEM are shown, n = 3 (biological replicates).
